# Supplementary material for: Endocytic trafficking promotes vacuolar enlargements for fast cell expansion rates in plants
Source: eLife. 2022 Jun 10;11:e75945. doi: 10.7554/eLife.75945 (PMC9187339; doi:10.7554/eLife.75945)
Supplement: Figure 1—source data 1. [file elife-75945-fig1-data1.xlsx]

## Sheet: Sheet1
Col-0		vti11
1.415		1.12
1.447		1.232
1.546		1.393
1.622		1.516
1.176		1.217
1.249		1.255
1.158		1.028
1.56		1.166
1.477		1.226
1.525		1.365
1.49		1.568
1.58		1.473
1.44		1.396
1.184		1.144
1.376		1.248
1.5		1.285
1.672		1.415
1.205		1.705
1.595		1.422
1.634		1.648
1.515		1.681
1.245		1.873
1.785		1.11
1.255		1.191
1.903		1.35
1.523		1.352
1.215		1.247
1.181		1.457
1.715		1.572
1.242		1.407
1.473		1.371
1.531		1.177
1.404
1.212
1.248
1.127
