# Supplementary material for: Endocytic trafficking promotes vacuolar enlargements for fast cell expansion rates in plants
Source: eLife. 2022 Jun 10;11:e75945. doi: 10.7554/eLife.75945 (PMC9187339; doi:10.7554/eLife.75945)
Supplement: Figure 1—source data 2. [file elife-75945-fig1-data2.xlsx]

## Sheet: Sheet1
Col-0		vti11
218.734		200.247
220.455		205.388
144.175		288.997
131.504		299.052
193.353		271.338
329.076		305.868
234.963		312.214
227.442		185.042
287.577		197.089
192.958		303.121
228.922		288.186
286.361		255.758
241.805		218.247
200.066		199.402
142.344		160.592
186.994		163.733
242.91		278.708
269.74		220.212
255.417		264.977
181.645		200.228
178.753		264.584
219.004		199.297
281.001		172.786
237.862		235.114
176.408		252.904
255.314		183.73
256.004		239.831
222.437		265.721
239.974		276.875
223.951		238.971
241.377		334.861
156.571		245.416
237.258		278.565
259.058		274.992
241.479		245.993
148.714		235.983
290.481		254.862
190.098		285.225
196.335		253.051
248.579		306.351
207.186		333.99
276.043		220.587
223.872		240.545
188.2		178.368
262.529		198.705
266.426		211.846
224.702		177.722
185.321		221.027
242.26		213.808
272.312		155.94
265.019		180.376
311.926		169.532
253.318		246.76
		215.155
		173.8
		155.005
		132.66
		150.461
		136.857
