# Supplementary material for: Endocytic trafficking promotes vacuolar enlargements for fast cell expansion rates in plants
Source: eLife. 2022 Jun 10;11:e75945. doi: 10.7554/eLife.75945 (PMC9187339; doi:10.7554/eLife.75945)
Supplement: Figure 1—source data 3. [file elife-75945-fig1-data3.xlsx]

## Sheet: Sheet1
		early meristem						late meristem						early elong.						late elong.
		cell vol.		vac. vol.		occupancy		cell vol.		vac. vol.		occupancy		cell vol.		vac. vol.		occupancy		cell vol.		vac. vol.		occupancy
Col-0
		906		306		0.337748		1529		792		0.517986		3047		2080		0.682639		8176		7775		0.950954
		799		283		0.354193		1651		718		0.434888		2487		1472		0.591878
		683		288		0.421669
		721		222		0.307906		2969		1423		0.479286		4077		2558		0.627422		7701		7109		0.923127
		829		232		0.279855														9946		9685		0.973758
		743		179		0.240915
		665		154.5		0.232331
		1428		488		0.341737		2791		1281		0.458975		6798		4322.5		0.635849		5703		4979		0.873049
		1353		400		0.295639		3033		1471		0.484998								11000		8982		0.816545
		1319		417		0.316149		2588		1338		0.517002
		1610		378.6		0.235155		3644		1074.5		0.294868		5894		3632		0.61622		10000		9632		0.9632
		1716		535		0.311772		2866		1590		0.55478
		1142		328		0.287215
		1333		414		0.310578
		977		242		0.247697		2598		1096		0.421863		4191		2286.5		0.545574		14700		14000		0.952381
		985		257		0.260914		2358		1253		0.531383
AVG		1075.56		320.256		0.298842		2602.7		1203.65		0.469603		4415.67		2725.17		0.616597		9603.71		8880.29		0.921859
SD		343.496		109.5		0.0507188		634.832		284.586		0.0746247		1650.4		1056.49		0.0458362		2859.78		2799.21		0.0572359
SEM		85.874		27.3749		0.0126797		200.751		89.9941		0.0235984		673.774		431.31		0.0187126		1080.9		1058		0.0216331
n		16		16		16		10		10		10		6		6		6		7		7		7
		early meristem						late meristem						early elong.						late elong.
		cell vol.		vac. vol.		occupancy		cell vol.		vac. vol.		occupancy		cell vol.		vac. vol.		occupancy		cell vol.		vac. vol.		occupancy
vti11
		1161		306		0.263566		1774		445		0.250846		3614		2314		0.640288		8914		8183		0.917994
		1149		258		0.224543		2255		871		0.386253								14500		13500		0.931034
		1248		215		0.172276		1705		764		0.448094
		1777		988		0.555993		2949		1371		0.464903		4184		2951		0.705306		17800		16900		0.949438
		1815		453		0.249587		3386		1870		0.552274								16700		16800		1.00599
		1750		726		0.414857		3027		1672		0.552362
		1394		567		0.406743		3729		2324		0.623223		5645		4184		0.741187		11800		11800		1
		1237		298		0.240905		4490		3197		0.712027
		1479		544.5		0.368154
		980		342		0.34898		2065		936		0.453269		3179		2045		0.643284		6316		6064		0.960101
		943		447		0.474019														6467		6090		0.941704
		804		244		0.303483
		1999		611		0.305653		2845		1232		0.43304		5829		2943		0.504889		17400		15300		0.87931
		2353		783.5		0.332979		2911		1429		0.490897		6744		4105		0.608689		19100		16600		0.86911
		2364		857		0.362521
AVG		1496.87		509.333		0.334951		2830.55		1464.64		0.487926		4865.83		3090.33		0.640607		13221.9		12359.7		0.939409
SD		493.454		243.233		0.101253		850.253		785.715		0.122353		1409.94		890.19		0.0821554		5007.47		4540.92		0.0470646
SEM		127.409		62.8025		0.0261435		256.361		236.902		0.0368908		575.607		363.419		0.0335398		1669.16		1513.64		0.0156882
n		15		15		15		11		11		11		6		6		6		9		9		9
