# Supplementary material for: Endocytic trafficking promotes vacuolar enlargements for fast cell expansion rates in plants
Source: eLife. 2022 Jun 10;11:e75945. doi: 10.7554/eLife.75945 (PMC9187339; doi:10.7554/eLife.75945)
Supplement: Figure 2—figure supplement 4—source data 1. [file elife-75945-fig2-figsupp4-data1.xlsx]

## Sheet: Sheet1
5d (after 2h treatment)
DMSO		VAC1 10µM		VAC1 25µM		Precursor2 25µM		Precursor1 25µM		VACA1 25µM		VACA2 25µM		VACA3 25µM		VACA4 25µM		VACA5 25µM
0.773		0.808		0.86		1		0.714		0.863		0.777		0.908		0.743		0.945
0.937		0.84		0.946		0.795		0.877		0.687		0.827		0.813		0.662		0.717
0.864		0.8		0.883		0.687		0.774		0.73		0.682		0.898		0.664		0.621
0.881		0.817		0.82		0.736		0.773		0.748		0.795		0.739		0.74		0.848
0.818		0.819		0.882		0.932		0.771		0.767		0.724		0.773		0.778		0.636
0.895		0.823		0.818		0.678		0.714		0.769		0.748		0.78		0.644		0.865
				0.734								0.669				0.824		0.672
																		0.674
+ 45h
DMSO		VAC1 10µM		VAC1 25µM		Precursor2 25µM		Precursor1 25µM		VACA1 25µM		VACA2 25µM		VACA3 25µM		VACA4 25µM		VACA5 25µM
1.418		1.431		1.565		1.603		1.286		0.934		1.481		1.595		0.746		1.538
1.701		1.395		1.681		1.481		1.635		0.676		1.463		1.469		0.646		1.253
1.508		1.179		1.592		1.389		1.431		0.88		1.211		1.612		0.652		1.203
1.683		1.334		1.64		1.357		1.459		0.739		1.197		1.341		0.741		1.434
1.539		1.339		1.637		1.545		1.398		0.774		1.301		1.435		0.748		1.152
1.594				1.418				1.227		0.771		1.392				0.642		1.452
												1.21				0.82		1.19
																		1.379
+ 92h
DMSO		VAC1 10µM		VAC1 25µM		Precursor2 25µM		Precursor1 25µM		VACA1 25µM		VACA2 25µM		VACA3 25µM		VACA4 25µM		VACA5 25µM
2.615		2.635		2.771		2.573		2.516		1.042		2.829		2.829		0.777		2.775
3.023		2.56		2.959		2.79		2.933		0.651		2.707		2.713		0.7		2.463
2.675		2.159		2.837		2.702		2.699		1.084		2.238		2.852		0.695		2.385
3.02		2.477		3.026		2.452		2.802		0.732		2.097		2.493		0.784		2.577
2.847		2.515		2.886		2.745		2.624		0.817		2.389		2.653		0.756		2.33
2.756				2.458				2.266		0.755		2.589				0.656		2.473
												2.188						2.343
																		2.578
