# Supplementary material for: Endocytic trafficking promotes vacuolar enlargements for fast cell expansion rates in plants
Source: eLife. 2022 Jun 10;11:e75945. doi: 10.7554/eLife.75945 (PMC9187339; doi:10.7554/eLife.75945)
Supplement: Figure 3—source data 1. [file elife-75945-fig3-data1.xlsx]

## Sheet: Sheet1
	VAC1			BFA+VAC1
series	mean grey value		series	mean grey value
2	145		2	93
	101			75
	161			92
6	136		6	66
	145			76
	115			61
10	83		10	58
	103			72
	95			64
14	120		16	71
	134			67
	142			86
18	100		20	62
	140			61
	122			49
22	106		24	91
	91			87
	86			77
26	113		28	56
	107			65
	150			60
30	84		32	83
	155			84
	138			99
	VAC1			BFA+VAC1
average	119.667			73.125
SD	24.2212			13.6392
n	24			24
