# Supplementary material for: Endocytic trafficking promotes vacuolar enlargements for fast cell expansion rates in plants
Source: eLife. 2022 Jun 10;11:e75945. doi: 10.7554/eLife.75945 (PMC9187339; doi:10.7554/eLife.75945)
Supplement: Figure 4—figure supplement 1—source data 1. [file elife-75945-fig4-figsupp1-data1.xlsx]

## Sheet: Sheet1
amiR vps39 #14-9 DMSO			amiR vps39 #14-9 DEX			amiR vps39 #14-9 VAC1			amiR vps39 #14-9 DEX+VAC1
root length	rel. growth		root length	rel. growth		root length	rel. growth		root length	rel. growth
1.769	113.975		0.659	85.5775		0.744	47.9353		0.481	62.4625
1.671	107.661		0.81	105.186		0.505	32.5367		0.236	30.6469
1.537	99.0277		0.944	122.588		0.824	53.0897		0.385	49.9959
1.611	103.796		0.901	117.004		0.673	43.3609		0.315	40.9058
1.53	98.5767		0.726	94.2781		0.794	51.1568		0.381	49.4765
1.523	98.1257		0.873	113.367		0.827	53.283		0.468	60.7743
1.679	108.177		0.904	117.393		0.398	25.6428		0.255	33.1142
1.552	99.9941		0.786	102.07		0.515	33.181		0.331	42.9835
1.526	98.319		0.793	102.979		0.815	52.5098		0.354	45.9703
1.48	95.3552		0.864	112.199		0.645	41.5568		0.523	67.9166
1.77	114.04		0.572	74.2797		1.028	66.2332		0.353	45.8404
1.408	90.7163		0.577	74.929		0.537	34.5985		0.39	50.6452
1.6	103.087		0.68	88.3045		0.61	39.3018		0.494	64.1506
1.326	85.4331		0.584	75.838		0.761	49.0306		0.493	64.0208
1.516	97.6747		0.801	104.017		0.651	41.9434		0.347	45.0613
1.433	92.3271		0.847	109.991		0.879	56.6333		0.288	37.3996
1.551	99.9297					0.585	37.6911		0.23	29.8677
1.604	103.344								0.31	40.2565
1.512	97.417								0.214	27.79
1.583	101.991
1.417	91.2962
1.548	99.7364
