# Supplementary material for: Endocytic trafficking promotes vacuolar enlargements for fast cell expansion rates in plants
Source: eLife. 2022 Jun 10;11:e75945. doi: 10.7554/eLife.75945 (PMC9187339; doi:10.7554/eLife.75945)
Supplement: Figure 4—source data 1. [file elife-75945-fig4-data1.xlsx]

## Sheet: Sheet1
amiR vps3 #14-3 DMSO			amiR vps3 #14-3 DEX			amiR vps3 #14-3 VAC1			amiR vps3 #14-3 DEX+VAC1
root length	rel. growth		root length	rel. growth		root length	rel. growth		root length	rel. growth
1.558	86.4702		0.755	146.722		0.496	27.5284		0.403	78.3165
2.209	122.601		0.324	62.9641		0.593	32.9119		0.366	71.1261
2.208	122.546		0.404	78.5108		0.846	46.9536		0.239	46.4457
2.093	116.163		0.64	124.374		0.837	46.4541		0.38	73.8468
1.162	64.4919		0.756	146.916		0.717	39.794		0.297	57.7171
1.427	79.1996		0.421	81.8145		0.791	43.9011		0.567	110.187
2.197	121.935		0.638	123.985		0.693	38.462		0.674	130.981
2.196	121.88		0.145	28.1784		0.531	29.4709		0.316	61.4094
1.378	76.48		0.299	58.1058		0.968	53.7247		0.303	58.8831
1.912	106.117		0.51	99.1102		1.079	59.8853		0.916	178.01
2.044	113.444		0.829	161.103		1.017	56.4443		0.249	48.3891
2.018	112		0.818	158.965		0.746	41.4036		0.938	182.285
1.07	59.3858		0.516	100.276		1.081	59.9963		0.494	96.0008
1.661	92.1867		0.6	116.6		0.791	43.9011		0.178	34.5914
1.585	87.9687		0.433	84.1465		0.889	49.3402		0.28	54.4134
1.856	103.009		0.407	79.0938		0.975	54.1132		0.316	61.4094
1.574	87.3582		0.784	152.358		0.562	31.1914		0.372	72.2921
1.005	55.7782		0.255	49.5551		0.558	30.9694
2.149	119.271		0.243	47.2231		0.865	48.0081
1.945	107.949					0.984	54.6127
2.15	119.327					0.986	54.7237
1.391	77.2015					1.221	67.7664
1.865	103.509					0.949	52.6702
1.831	101.622					0.747	41.4591
2.059	114.276					0.809	44.9001
2.287	126.93
1.818	100.9
