# Supplementary material for: Endocytic trafficking promotes vacuolar enlargements for fast cell expansion rates in plants
Source: eLife. 2022 Jun 10;11:e75945. doi: 10.7554/eLife.75945 (PMC9187339; doi:10.7554/eLife.75945)
Supplement: Figure 4—source data 2. [file elife-75945-fig4-data2.xlsx]

## Sheet: Sheet1
Col-0 DMSO			vti11 DMSO			Col-0 VAC1			vti11 VAC1
root length	rel. growth		root length	rel. growth		root length	rel. growth		root length	rel. growth
1.152	98.6301		1.217	111.136		0.642	54.9658		0.69	63.0103
1.185	101.455		1.22	111.41		0.618	52.911		0.832	75.9777
1.102	94.3493		0.916	83.6485		0.693	59.3322		0.895	81.7308
1.076	92.1233		1.005	91.7759		0.783	67.0377		0.941	85.9315
1.077	92.2089		1.217	111.136		0.72	61.6438		0.815	74.4252
1.121	95.976		1.227	112.049		0.75	64.2123		0.981	89.5842
1.135	97.1747		1.079	98.5335		0.875	74.9144		1.1	100.451
1.051	89.9829		0.975	89.0363		0.662	56.6781		0.974	88.945
1.312	112.329		1.197	109.309		0.952	81.5068		1.031	94.1502
1.138	97.4315		1.1	100.451		0.886	75.8562		0.972	88.7624
1.237	105.908		1.112	101.547		1.019	87.2432		1.099	100.36
1.252	107.192		1.027	93.7849		0.958	82.0205		0.837	76.4343
1.031	88.2705		1.168	106.661		0.895	76.6267		0.985	89.9495
1.183	101.284		0.923	84.2877		1.101	94.2637		0.759	69.3113
1.081	92.5514		0.998	91.1367		0.963	82.4486		1.002	91.5019
1.25	107.021		1.11	101.364		0.886	75.8562
1.329	113.784		1.125	102.734		0.935	80.0514
1.361	116.524
1.212	103.767
1.203	102.997
1.169	100.086
1.108	94.863
1.099	94.0925
1.168	100		1.09506	100		0.843412	72.2099		0.927533	84.7017
