# Supplementary material for: Endocytic trafficking promotes vacuolar enlargements for fast cell expansion rates in plants
Source: eLife. 2022 Jun 10;11:e75945. doi: 10.7554/eLife.75945 (PMC9187339; doi:10.7554/eLife.75945)
Supplement: Figure 5—figure supplement 1—source data 1. [file elife-75945-fig5-figsupp1-data1.xlsx]

## Sheet: Sheet1
early meristem
image		27		21		14		8		2
PM1		78.193		103.542		207.582		83.52		65.992
PM2		71.065		93.844		203.273		81.084		55.906
PM3		68.633		86.825		161.314		106.412		58.941
avg		72.6303		94.737		190.723		90.3387		60.2797
late meristem
image		29		21		14		8		4
PM1		88.5		107.922		168.764		61.541		84.77
PM2		83.781		137.772		226.356		66.657		72.324
PM3		57.26		128.394		195.058		63.285		58.936
avg		76.5137		124.696		196.726		63.8277		72.01
early elongating
image		29		23		16		10		4
PM1		34.955		109.169		108.593		61.373		53.319
PM2		46.105		102.818		128.213		53.257		64.019
PM3		91.924		59.727		91.862		41.101		46.452
avg		57.6613		90.5713		109.556		51.9103		54.5967
late elongating
image		31		25		19		12		6
PM1		82.203		72.207		81.41		54.569		50.883
PM2		56.275		81.514		45.313		46.126		59.987
PM3		69.775		71.295		95.465		69.521		56.304
avg		69.4177		75.0053		74.0627		56.7387		55.7247
