# Supplementary material for: Endocytic trafficking promotes vacuolar enlargements for fast cell expansion rates in plants
Source: eLife. 2022 Jun 10;11:e75945. doi: 10.7554/eLife.75945 (PMC9187339; doi:10.7554/eLife.75945)
Supplement: Figure 5—figure supplement 1—source data 2. [file elife-75945-fig5-figsupp1-data2.xlsx]

## Sheet: Sheet1
DMSO	DMSO		VAC1	VAC1
early meristem	late meristem		early meristem	late meristem
21.695	17.781		32.504	70.596
19.457	14.441		30.759	64.114
63.514	35.471		39.397	58.305
51.713	39.688		39.313	69.829
50.236	33.079		31.594	38.805
34.152	32.857		34.873	75.835
34.728	34.428		26.03	39.629
34.651	26.953		32.882	27.846
32.917	22.891		28.724	35.196
31.186	29.68		39.192	31.149
17.733	19.011		31.489	32.503
22.58	22.391		26.992	43.72
29.199	21.105		14.949	39.853
19.033	15.475		23.456	34.887
13.731	17.329		26.717	40.465
15.7	13.811		25.3	39.182
