# Supplementary material for: Endocytic trafficking promotes vacuolar enlargements for fast cell expansion rates in plants
Source: eLife. 2022 Jun 10;11:e75945. doi: 10.7554/eLife.75945 (PMC9187339; doi:10.7554/eLife.75945)
Supplement: Figure 5—source data 1. [file elife-75945-fig5-data1.xlsx]

## Sheet: Sheet1
early meristem		late meristem (~square)		early elongation		late elongation
intensity (mean value 5x5 µm)		intensity (mean value 5x5µm)		intensity (mean value 5x5µm)		intensity (mean value 5x5µm)
30		117		167		233
36		85		190		231
22		167		223		190
53		42.6		226		205
52		50.5		204		230
43		82		207		178
32		135		161		183
32		115		219		106
22		147		135
62		72		169
50		98		201
76		182
