# Supplementary material for: Endocytic trafficking promotes vacuolar enlargements for fast cell expansion rates in plants
Source: eLife. 2022 Jun 10;11:e75945. doi: 10.7554/eLife.75945 (PMC9187339; doi:10.7554/eLife.75945)
Supplement: Figure 5—source data 2. [file elife-75945-fig5-data2.xlsx]

## Sheet: Sheet1
early meristem		late meristem		early elongation		late elongation
intensity (mean value 5x5 µm)		intensity (mean value 5x5µm)		intensity (mean value 5x5µm)		intensity (mean value 5x5µm)
47.1		52.8		96.1		87.6
37		49		59.7		116.2
39.3		51.8		96.2		126.4
19		47		32		81.6
24.1		59.2		20.6		103.8
27.5		32.8		53.7		63.9
37.3		13.9		76.5		63.9
31.3		15.5		69.5		86.4
25.2		16.1		56.9		92.4
