# Supplementary material for: Endocytic trafficking promotes vacuolar enlargements for fast cell expansion rates in plants
Source: eLife. 2022 Jun 10;11:e75945. doi: 10.7554/eLife.75945 (PMC9187339; doi:10.7554/eLife.75945)
Supplement: Figure 5—source data 3. [file elife-75945-fig5-data3.xlsx]

## Sheet: Sheet1
	early meristem			late meristem					early meristem			late meristem
cell	cell area	BFA body area		cell area	BFA body area			cell	cell vol.	BFA body vol.		cell vol.	BFA body vol.
1	689	242		967	500			1	1256	90.5		2147	275
2	716	155		1356	306			2	1320	73.4		3412	192
3	426	66.7		1441	519			3	599	18.3		3202	235
4	654	82.1		974	214			4	1224	30.6		2181	113
5	686	201		998	189			5	1296	55.3		2195	88.2
6	513	82.1		1476	547			6	744	26		3536	265
7	488	56.4		937	130			7	772	20.6		2140	67.5
8	581	54.6		1209	285			8	986	14.6		3152	122
9	702	81.1		1138	144			9	1321	26.3		2727	108
10	796	127		1618	496			10	1486	32.9		4636	236
rel. cell volume increase	rel. bfa body volume increase			rel. cell surface area increase	rel. bfa body surface area increase
cell volume	BFA body volume			cell surface area	BFA body surface area
1.95111	7.07851			1.54695	4.3554
3.10069	4.94208			2.16925	2.66551
2.90985	6.04891			2.30523	4.52091
1.98201	2.90862			1.55815	1.86411
1.99473	2.27027			1.59654	1.64634
3.21338	6.82111			2.36122	4.76481
1.94475	1.73745			1.49896	1.1324
2.86441	3.14028			1.93409	2.48258
2.47819	2.77992			1.82051	1.25436
4.21301	6.07465			2.58839	4.32056
