# Supplementary material for: Endocytic trafficking promotes vacuolar enlargements for fast cell expansion rates in plants
Source: eLife. 2022 Jun 10;11:e75945. doi: 10.7554/eLife.75945 (PMC9187339; doi:10.7554/eLife.75945)
Supplement: Figure 5—source data 4. [file elife-75945-fig5-data4.xlsx]

## Sheet: Sheet1
early meristem				late meristem				early elongating				late elongating
image #	Rtotal			image #	Rtotal			image #	Rtotal			image #	Rtotal
58	0.341			58	0.442			60	0.628			62	0.827
54	0.31			54	0.358			54	0.742			56	0.76
43	0.264			43	0.077			46	0.45			48	0.635
35	0			37	0.061			39	0.692			41	0.753
29	0.188			29	0.214			31	0.641			33	0.695
23	0			25	0.145			25	0.307			27	0.833
17	0			17	0.079			19	0.669			21	0.669
9	0.091			9	0			11	0.691			14	0.815
3	0			3	-0.008			5	0.355			7	0.696
