# Supplementary material for: Endocytic trafficking promotes vacuolar enlargements for fast cell expansion rates in plants
Source: eLife. 2022 Jun 10;11:e75945. doi: 10.7554/eLife.75945 (PMC9187339; doi:10.7554/eLife.75945)
Supplement: Figure 6—source data 1. [file elife-75945-fig6-data1.xlsx]

## Sheet: Sheet1
DMSO
	early meristem						late meristem						early elongation						late elongation
		cell area		vac area				cell area		vac area				cell area		vac area				cell area		vac area
root1		694		557				1131		1218				1747		2132				4536		4203
root2		1042		1392				1133		1216				2321		2543				5065		4636
root3		823		814				1223		1532				1588		1729				4550		4411
root4		716		708				1113		1035				1390		1181				3697		3420
root5		655		717				942		983				1374		1109				3760		3200
root6		691		539				1100		1045				1534		1466				4068		3601
root7		748		839				1363		1443				2078		1979				4190		3404
root8		615		571				945		785				1810		1671				4388		3802
VAC1
	early meristem						late meristem						early elongation						late elongation
		cell area		vac area				cell area		vac area				cell area		vac area				cell area		vac area
root1		863		460				1579		973				1605		1058				5684		4863
root2		584		402				886		605				1309		683				3217		2569
root3		1007		695				1132		696				2088		2056				4280		3834
root4		485		331				623		405				1530		1328				3237		2725
root5		596		394				980		541				1226		662				4829		4418
root6		715		513				1022		669				2007		1453				4037		3397
root7		741		434				1323		992				1916		1572				4903		4343
root8		713		492				1148		862				1900		1369				5443		4741
root9		562		293				1047		893				1676		1515				4571		3933
