# Supplementary material for: Endocytic trafficking promotes vacuolar enlargements for fast cell expansion rates in plants
Source: eLife. 2022 Jun 10;11:e75945. doi: 10.7554/eLife.75945 (PMC9187339; doi:10.7554/eLife.75945)
Supplement: Figure 6—source data 2. [file elife-75945-fig6-data2.xlsx]

## Sheet: Sheet1
	DMSO				VAC1 20µM
root				root
1	299.132			1	181.355
2	301.124			2	194.054
3	272.323			3	212.729
4	303.116			4	293.156
5	266.845			5	262.778
6	365.2			6	254.81
7	419.98			7	327.352
8	293.82			8	310.669
9	241.779			9	227.503
10	229.329			10	227.586
11	351.837			11	68.475
12	343.039			12	138.278
13	395.412			13	147.574
14	248.585			14	86.901
15	293.571			15	120.516
16	327.352			16	123.753
17	388.523			17	139.274
18	260.288			18	118.856
				19	124.583
