# Supplementary material for: Endocytic trafficking promotes vacuolar enlargements for fast cell expansion rates in plants
Source: eLife. 2022 Jun 10;11:e75945. doi: 10.7554/eLife.75945 (PMC9187339; doi:10.7554/eLife.75945)
Supplement: Figure 6—source data 3. [file elife-75945-fig6-data3.xlsx]

## Sheet: Sheet1
DMSO		VAC1		DMSO		VAC1
t0		t0		t165		t165
188.991		212.895		338.225		278.548
163.427		142.594		293.986		192.892
230.076		152.471		358.228		256.221
186.501		169.32		311.25		281.121
194.054		195.465		297.472		334.158
233.064		216.464		386.116		287.097
200.196		152.388		349.181		195.88
195.963		182.351		312.578		263.359
169.652		119.354		308.677		170.648
162.597		172.059		258.213		233.23
192.809		190.402		391.096		277.386
122.425		143.59		190.568		253.316
182.932		118.69		286.267		177.288
167.909		207.417		276.307		269.418
140.353		149.566		224.017		188.825
